# Supplementary material
Source: publisher figshare collection journal article supplement (https://sage.figshare.com/ndownloader/files/18169223)
Supplement: Supplementary file 1 [file 18169223]

|       |                |                      |                                           |
|-------|----------------|----------------------|-------------------------------------------|
| PFDAQ | Participant N° | Interviewer initials | Date of interview presentation (MM DD YY) |
|       | I _ I _ I _ I  | I _ I _ I            | I _ I _ I _ I _ I _ I _ I _ I _ I         |

## SUPPLEMENTARY FILE

### **The Pedophilic Fantasies, Desires and Activities Questionnaire (PFDAQ)**

**The Pedophilic Fantasies, Desires and Activity Questionnaire**

As an introduction to the presentation of the questionnaire, the interviewer introduces herself/himself by telling her/his name and then thanks the patient/subject for his participating in the interview. Then:

- ▶ if the participant is a patient, she/he tells him that “the objective of the questionnaire is to better understand the sex life of patients who feel sexually attracted to children” ;
- ▶ if the participant is a healthy volunteer of a research study, she/he tells him that “the objective of the questionnaire is to better understand the sex life of subjects who are to participate as controls in the study and will be compared to patients with pedophilic disorder; therefore, it is important that some of the questions to the patients be also asked to the controls.”

Then, the interviewer states that she/he is bound by professional confidentiality and that the answers to the interview shall be kept anonymously.

N.B. Hereunder, sentences in CAPITAL LETTERS are meant only for the interviewer and are not to be said to the participant. Sentences in lowercase letters are used to question the participant and are to be said exactly as they are written.

|       |                |                      |                                           |
|-------|----------------|----------------------|-------------------------------------------|
| PFDAQ | Participant N° | Interviewer initials | Date of interview presentation (MM DD YY) |
|       | I _ I _ I _ I  | I _ I _ I            | I _ I _ I I _ I _ I I _ I _ I             |

## FIRST SECTION: CHILDREN, ADOLESCENTS, ADULTS

I am going to ask you a number of questions regarding your sex life in the last thirty days. I shall ask questions regarding three domains: (1) the domain of sexual fantasies, that is to say the sexually arousing scenes that you imagine in your mind; (2) the domain of sexual desires; and (3) the domain of sexual activities.

### PART A: SEXUAL FANTASIES

#### OBJECTS OF SEXUAL FANTASIES IN THE LAST THIRTY DAYS

**A1. My first question focuses on your sexual fantasies, that is to say the sexually arousing scenes that you imagine in your mind.**

CHECK THE BOX THAT CORRESPONDS TO THE PARTICIPANT'S ANSWER.

Q1. In the last thirty days, have you ever had sexual fantasies about **female children**? **In the whole interview, « female children » means « girls before the onset of puberty » or « girls beginning puberty ».**

1. YES I \_ I                      0. NO I \_ I

Q2. In the last thirty days, have you ever had sexual fantasies about **male children**? **In the whole interview, « male children » means « boys before the onset of puberty » or « boys beginning puberty ».**

1. YES I \_ I                      0. NO I \_ I

Q3. In the last thirty days, have you ever had sexual fantasies about **adolescent girls**? **"Adolescent girls" means here "girls less than 16 years of age, either finishing puberty or after the end of puberty".**

1. YES I \_ I                      0. NO I \_ I

Q4. In the last thirty days, have you ever had sexual fantasies about **adolescent boys**? **Here also, "adolescent boys" means "boys less than 16 years of age, either finishing puberty or after the end of puberty".**

1. YES I \_ I                      0. NO I \_ I

Q5. In the last thirty days, have you ever had sexual fantasies about **women aged more than 16 years**? **The phrase « women aged more than 16 years» means principally adult women, whether your spouse or other women.**

1. YES I \_ I                      0. NO I \_ I

Q6. In the last thirty days, have you ever had sexual fantasies about **men aged more than 16 years**? **The phrase « men aged more than 16 years» means principally adult men, whether a stable partner or other men.**

1. YES I \_ I                      0. NO I \_ I

|       |                |                      |                                           |
|-------|----------------|----------------------|-------------------------------------------|
| PFDAQ | Participant N° | Interviewer initials | Date of interview presentation (MM DD YY) |
|       | I _ I _ I _ I  | I _ I _ I            | I _ I _ I I _ I _ I _ I _ I _ I           |

### FREQUENCY OF SEXUAL FANTASIES IN THE LAST THIRTY DAYS

IN THE NEXT QUESTION, THE INTERVIEWER MUST MENTION ONLY THE CATEGORY OR CATEGORIES (AGE AND SEX) THAT THE PARTICIPANT HAS SPECIFIED TO BE THE OBJECTS OF HIS FANTASIES.

**A2. In the last thirty days, how many times altogether have you had sexual fantasies about [FINISH YOUR QUESTION BASED ON ANSWERS TO Q1 TO Q6]? Tell me “yes » when what I say corresponds to what happened.**

READ THE PROPOSED ANSWERS UNTIL THE PARTICIPANT SAYS “YES”; CIRCLE THE NUMERAL FACING THE “YES” ANSWER.

**Q7. Did it happen:**

|                                                                      |   |                                 |
|----------------------------------------------------------------------|---|---------------------------------|
| Almost continuously?                                                 | 9 | IF YES, ➔ GO TO A2.1.           |
| More than once an hour?                                              | 8 | IF YES, ➔ GO TO A2.1.           |
| More than once a day?                                                | 7 | IF YES, ➔ GO TO A2.1.           |
| Once a day?                                                          | 6 | IF YES, ➔ GO TO A2.4.           |
| Less than once a day,<br>but several times a week?                   | 5 | IF YES, ➔ GO TO A2.2.           |
| Once a week?                                                         | 4 | IF YES, ➔ GO TO A2.4.           |
| Less than once a week,<br>but several times in the last thirty days? | 3 | IF YES, ➔ GO TO A2.3.           |
| Once?                                                                | 2 | IF YES, ➔ GO TO A2.4.           |
| Not at all?                                                          | 1 | IF YES, ➔ GO TO PART B, page 5. |

NOTE: FOR ALL QUESTIONS, IF A PARTICIPANT MENTIONS TWO OR MORE NUMBERS IN HIS ANSWER (EX.: “2 OR 3 TIMES”), USE THE MEAN AND WRITE DOWN THE FIRST DECIMAL (EX. “2.5”).

**A2.1. IF THE NUMBER OF THE ANSWER IS 7, 8, OR 9 (FREQUENCY HIGHER THAN ONCE A DAY):**

Q8. Approximately how many times a day have you had sexual fantasies? I \_ I \_ I \_ I  
GO TO A2.4.

**A2.2. IF YES TO “MORE THAN ONCE A WEEK”:**

Q9. Approximately how many times a week have you had sexual fantasies? I \_ I \_ I \_ I  
GO TO A2.4.

**A2.3. IF YES TO “SEVERAL TIMES IN THE LAST THIRTY DAYS”:**

Q10. In the last 30 days, approximately how many times have you had sexual fantasies? I \_ I \_ I \_ I  
GO TO A2.4.

|       |                |                      |                                           |
|-------|----------------|----------------------|-------------------------------------------|
| PFDAQ | Participant N° | Interviewer initials | Date of interview presentation (MM DD YY) |
|       | I _ I _ I _ I  | I _ I _ I            | I _ I _ I I _ I _ I I _ I _ I _ I         |

**A2.4.** ASK THE FOLLOWING QUESTION TO ALL PARTICIPANTS, EXCEPT THOSE WHO HAVE ANSWERED « NOT AT ALL » TO Q7:

**I am going to ask you how arousing your sexual fantasies have been, in general, in the last 30 days. Tell me “yes” when what I say corresponds to what you have felt.**

**Q11. Was sexual arousal related to these fantasies ...?**

- |                                      |   |
|--------------------------------------|---|
| 9. Extremely strong?                 | 9 |
| 8. Very strong?                      | 8 |
| 7. Strong?                           | 7 |
| 6. Fairly strong?                    | 6 |
| 5. Moderate?                         | 5 |
| 4. Fairly low?                       | 4 |
| 3. Low?                              | 3 |
| 2. Very low?                         | 2 |
| 1. Nonexistent or quasi nonexistent? | 1 |

**Q12. At what times during the day do you have these sexual fantasies? (NOTE THE ANSWER)**

---



---



---

**Q13. In general, how long do these fantasies last? (NOTE THE ANSWER)**

---



---

In general, do they last less or more than 15 minutes?

1. More I \_ I      0. Less I \_ I

**Q14. Do they come back into your mind all day long?**

---



---

1. YES I \_ I      0. NO I \_ I

**Q15. Do you seek to drive them out of your mind?**

---



---

1. YES I \_ I      0. NO I \_ I

|       |                |                      |                                           |
|-------|----------------|----------------------|-------------------------------------------|
| PFDAQ | Participant N° | Interviewer initials | Date of interview presentation (MM DD YY) |
|       | I _ I _ I _ I  | I _ I _ I            | I _ I _ I I _ I _ I I _ I _ I _ I         |

IF THE PARTICIPANT ANSWERED YES TO Q15:

Q16. Do you have a hard time to drive these fantasies out of your mind and do they come back despite your efforts?

1. YES I \_ I

0. NO I \_ I

### PART B: SEXUAL DESIRES

#### OBJECTS OF SEXUAL DESIRES IN THE LAST THIRTY DAYS

**B1. My next question focuses on your sexual desires, that is to say the craving to engage in sexual acts.**

CHECK THE BOX THAT CORRESPONDS TO THE PARTICIPANT'S ANSWER

Q17. In the last thirty days, have you ever had sexual desires for **female children**?

1. YES I \_ I

0. NO I \_ I

Q18. In the last thirty days, have you ever had sexual desires for **male children**?

1. YES I \_ I

0. NO I \_ I

Q19. In the last thirty days, have you ever had sexual desires for **adolescent girls**?

1. YES I \_ I

0. NO I \_ I

Q20. In the last thirty days, have you ever had sexual desires for **adolescent boys**?

1. YES I \_ I

0. NO I \_ I

Q21. In the last thirty days, have you ever had sexual desires for **women aged more than 16 years, whether for your spouse or for other women**?

1. YES I \_ I

0. NO I \_ I

Q22. In the last thirty days, have you ever had sexual desires for **men aged more than 16 years, whether for a stable partner or for other men**?

1. YES I \_ I

0. NO I \_ I

|       |                |                      |                                           |
|-------|----------------|----------------------|-------------------------------------------|
| PFDAQ | Participant N° | Interviewer initials | Date of interview presentation (MM DD YY) |
|       | I _ I _ I _ I  | I _ I _ I            | I _ I _ I I _ I _ I _ I _ I _ I           |

### FREQUENCY OF SEXUAL DESIRES IN THE LAST THIRTY DAYS

IN THE NEXT QUESTION, THE INTERVIEWER MUST MENTION ONLY THE CATEGORY OR CATEGORIES (AGE AND SEX) THAT THE PARTICIPANT HAS SPECIFIED TO BE THE OBJECTS OF HIS DESIRES.

**B2. In the last thirty days, how many times altogether have you had sexual desires for [FINISH YOUR QUESTION BASED ON ANSWERS TO Q17 TO Q22]? If you have watched erotic photographs or movies (on the Internet or otherwise), take into account the sexual desires you felt on these occasions. Tell me “yes » when what I say corresponds to what happened.**

READ THE PROPOSED ANSWERS UNTIL THE PARTICIPANT SAYS “YES”; CIRCLE THE NUMERAL FACING THE "YES" ANSWER.

#### **Q23. Did it happen:**

|                                                                      |   |                                 |
|----------------------------------------------------------------------|---|---------------------------------|
| Almost continuously?                                                 | 9 | IF YES, ➔ GO TO B2.1.           |
| More than once an hour?                                              | 8 | IF YES, ➔ GO TO B2.1.           |
| More than once a day?                                                | 7 | IF YES, ➔ GO TO B2.1.           |
| Once a day?                                                          | 6 | IF YES, ➔ GO TO B2.4.           |
| Less than once a day,<br>but several times a week?                   | 5 | IF YES, ➔ GO TO B2.2.           |
| Once a week?                                                         | 4 | IF YES, ➔ GO TO B2.4., P. 7.    |
| Less than once a week,<br>but several times in the last thirty days? | 3 | IF YES, ➔ GO TO B2.3.           |
| Once?                                                                | 2 | IF YES, ➔ GO TO B2.4.           |
| Not at all?                                                          | 1 | IF YES, ➔ GO TO PART C, page 8. |

NOTE: FOR ALL QUESTIONS, IF A PARTICIPANT MENTIONS TWO OR MORE NUMBERS IN HIS ANSWER (EX.: "2 OR 3 TIMES"), USE THE MEAN AND WRITE DOWN THE FIRST DECIMAL (EX. "2.5").

**B2.1.** IF THE NUMBER OF THE ANSWER IS 7, 8, OR 9 (FREQUENCY HIGHER THAN ONCE A DAY):

Q24. Approximately how many times a day have you had sexual desires? I \_ I \_ I \_ I  
GO TO B2.4.

**B2.2.** IF THE NUMBER OF THE ANSWER IS 5 (FREQUENCY HIGHER THAN ONCE A WEEK):

Q25. Approximately how many times a week have you had sexual desires? I \_ I \_ I \_ I  
GO TO B2.4.

|       |                |                      |                                           |
|-------|----------------|----------------------|-------------------------------------------|
| PFDAQ | Participant N° | Interviewer initials | Date of interview presentation (MM DD YY) |
|       | I _ I _ I _ I  | I _ I _ I            | I _ I _ I I _ I _ I I _ I _ I _ I         |

**B2.3.** IF THE NUMBER OF THE ANSWER IS 3 (FREQUENCY HIGHER THAN ONCE IN THE LAST 30 DAYS):

Q26. In the last 30 days, approximately how many times have you had sexual desires? I \_ I \_ I \_ I

GO TO B2.4.

**B2.4.** ASK THE FOLLOWING QUESTION TO ALL PARTICIPANTS, EXCEPT THOSE WHO HAVE ANSWERED 1 TO Q23 (NOT AT ALL):

**I am going to ask you how arousing your sexual desires have been, in general, in the last 30 days. Tell me “yes” when what I say corresponds to what you have felt.**

**Q27. Was sexual arousal related to these desires ...?**

- |                                      |   |
|--------------------------------------|---|
| 9. Extremely strong?                 | 9 |
| 8. Very strong?                      | 8 |
| 7. Strong?                           | 7 |
| 6. Fairly strong?                    | 6 |
| 5. Moderate?                         | 5 |
| 4. Fairly low?                       | 4 |
| 3. Low?                              | 3 |
| 2. Very low?                         | 2 |
| 1. Nonexistent or quasi nonexistent? | 1 |

**Q28. At what times during the day do you have these sexual desires? (NOTE THE ANSWER)**

---



---

**Q29. In general, how long do these desires last? (NOTE THE ANSWER)**

---



---

In general, do they last less or more than 15 minutes?

1. More I \_ I                      0. Less I \_ I

**Q30. Do they come back into your mind all day long?**

---



---

1. YES I \_ I                      0. NO I \_ I



|       |                |                      |                                           |
|-------|----------------|----------------------|-------------------------------------------|
| PFDAQ | Participant N° | Interviewer initials | Date of interview presentation (MM DD YY) |
|       | I _ I _ I _ I  | I _ I _ I            | I _ I _ I I _ I _ I I _ I _ I _ I         |

Q31. Do you seek to drive them out of your mind?

1. YES I \_ I                      0. NO I \_ I

IF THE PARTICIPANT ANSWERED YES TO Q31:

Q32. Do you have a hard time to drive these desires out of your mind and do they come back despite your efforts?

1. YES I \_ I                      0. NO I \_ I

### PART C: SEXUAL ACTIVITY

#### FREQUENCY OF SEXUAL ACTIVITY IN THE LAST 30 DAYS

**C1. In the last thirty days, how many times altogether have you had an ejaculation, whether through masturbation or through a sexual activity with another person? Tell me “yes » when what I say corresponds to what happened.**

READ THE PROPOSED ANSWERS UNTIL THE PARTICIPANT SAYS “YES”; CIRCLE THE NUMERAL FACING THE "YES" ANSWER.

Q33. **Did it happen:**

- |                                                                      |   |                              |
|----------------------------------------------------------------------|---|------------------------------|
| More than three times a day?                                         | 9 | IF YES, ➔ GO TO C1.1., P. 9. |
| More than twice a day?                                               | 8 | IF YES, ➔ GO TO C1.1., P. 9. |
| More than once a day?                                                | 7 | IF YES, ➔ GO TO C1.1., P. 9. |
| Once a day?                                                          | 6 | IF YES, ➔ GO TO C2, P. 9.    |
| Less than once a day,<br>but several times a week?                   | 5 | IF YES, ➔ GO TO C1.2., P. 9. |
| Once a week?                                                         | 4 | IF YES, ➔ GO TO C2, P. 9.    |
| Less than once a week,<br>but several times in the last thirty days? | 3 | IF YES, ➔ GO TO C1.3., P. 9. |
| Once?                                                                | 2 | IF YES, ➔ GO TO C2, P. 9.    |
| Not at all?                                                          | 1 | IF YES, ➔ GO TO C2, P. 9.    |

|       |                |                      |                                           |
|-------|----------------|----------------------|-------------------------------------------|
| PFDAQ | Participant N° | Interviewer initials | Date of interview presentation (MM DD YY) |
|       | I _ I _ I _ I  | I _ I _ I            | I _ I _ I I _ I _ I _ I _ I _ I           |

**C1.1.** IF THE NUMBER OF THE ANSWER IS 7, 8, OR 9 (FREQUENCY HIGHER THAN ONCE A DAY):

Q34. Approximately how many times a day have you had an ejaculation? I \_ I \_ I \_ I

GO TO C2.

**C1.2.** IF THE NUMBER OF THE ANSWER IS 5 (FREQUENCY HIGHER THAN ONCE A WEEK):

Q35. Approximately how many times a week have you had an ejaculation? I \_ I \_ I \_ I

GO TO C2.

**C1.3.** IF THE NUMBER OF THE ANSWER IS 3 (FREQUENCY HIGHER THAN ONCE IN THE LAST 30 DAYS):

Q36. In the last 30 days, approximately how many times have you had an ejaculation? I \_ I \_ I \_ I

GO TO C2.

### FREQUENCY OF PARAPHILIC SEXUAL BEHAVIORS IN THE LAST 4 MONTHS

NOTE. FOR MEN WHO HAVE BEEN FREED FROM PRISON LESS THAN 4 MONTHS BEFORE THE INTERVIEW, THE PERIODS THAT MUST BE TAKEN INTO ACCOUNT IN ORDER TO ASSESS THE FREQUENCY OF PARAPHILIC SEXUAL BEHAVIORS IN THE LAST 4 MONTHS ARE THE PERIOD THAT FOLLOWS RELEASE FROM PRISON AND THE PERIOD PRECEDING THE ARREST LEADING TO IMPRISONMENT. EXAMPLE 1: FOR A PARTICIPANT RELEASED ONE MONTH BEFORE THE INTERVIEW, THE INTERVIEWER MUST TAKE INTO ACCOUNT THE MONTH FOLLOWING THE RELEASE AND THE 3 MONTHS PRECEDING THE ARREST LEADING TO IMPRISONMENT. EXAMPLE 2: FOR A PARTICIPANT RELEASED 2 DAYS BEFORE THE INTERVIEW, THE INTERVIEWER MUST TAKE INTO ACCOUNT THE 4 MONTHS PRECEDING THE ARREST LEADING TO IMPRISONMENT.

**C2. The next questions focus on the deviant sexual behaviors, whether ejaculation occurred or not. By “deviant sexual behaviors”, I mean:**

A) sexual behaviors, with children, adolescents or adults, of the following kinds:

- exhibitionism, that is to say, showing one’s genitals to a nonconsenting person
- voyeurism, that is to say, to look at a nude person without her or his consent
- fetishism, that is to say, to use objects such as shoes, underwear gloves, etc., to get sexually aroused
- transvestism, that is to say, to dress as a woman
- frotteurism, to touch or to rub against a nonconsenting person
- masochism, behaviors where a person feels sexual pleasure when he or she suffers, for instance when beaten or humiliated
- sadism, behaviors where a person feels sexual pleasure when he or she causes another person to suffer
- rape, that is to say, any type of sexual penetration forced upon another person, whether it is achieved with the penis, the fingers or a foreign body
- or any other sexual behavior that seemed deviant to you.

|       |                |                      |                                           |
|-------|----------------|----------------------|-------------------------------------------|
| PFDAQ | Participant N° | Interviewer initials | Date of interview presentation (MM DD YY) |
|       | I _ I _ I _ I  | I _ I _ I            | I _ I _ I I _ I _ I I _ I _ I _ I         |

B) sexual behaviors with children; any sexual behavior with children must be taken into account, even if it seemed to you that the child was consenting.

C) If you have watched erotic movies or videos (on the Internet or otherwise), do not take this into account in your answer to the next questions.

HAND OVER TO THE PARTICIPANT THE QUESTIONNAIRE OPEN AT THE PAGE THAT LISTS THE DEVIANT BEHAVIORS. THIS LIST IS ON PAGE 23.

**For each behavior of this list, please check the YES or NO box depending on whether you have had, or not had, the corresponding behavior in the last four months.**

IF THE PARTICIPANT HAS BEEN RELEASED FROM PRISON LESS THAN 4 MONTHS AGO, TELL HIM:

**The four-month period that I ask you to take into account comprises the [n1] weeks before you were arrested and imprisoned, plus the [n2] weeks since you were released from prison.**

WHEN THE PARTICIPANT HAS FINISHED CHECKING THE BOXES ON PAGE 23:

**In the last 4 months, how many times altogether have you had one or several of these deviant sexual behaviors, whether or not ejaculation occurred?**

IF A PARTICIPANT ANSWERS SPONTANEOUSLY “NEVER”, CIRCLE “1” HEREUNDER AND GO TO THE SECOND SECTION OF THE QUESTIONNAIRE, P. 12. OTHERWISE, READ THE PROPOSED ANSWERS UNTIL THE PARTICIPANT SAYS “YES”; CIRCLE THE NUMERAL FACING THE “YES” ANSWER.

Q37. Did it happen:

|                                                              |   |                                   |
|--------------------------------------------------------------|---|-----------------------------------|
| More than once a day?                                        | 9 | IF YES, ➔ GO TO C2.1., P. 11.     |
| Once a day?                                                  | 8 | IF YES, ➔ GO TO SECTION 2, P. 12. |
| Less than once a day,<br>but several times a week?           | 7 | IF YES, ➔ GO TO C2.2., P. 11.     |
| Once a week?                                                 | 6 | IF YES, ➔ GO TO SECTION 2, P. 12. |
| Less than once a week,<br>but several times a month?         | 5 | IF YES, ➔ GO TO C2.3., P. 11.     |
| Once a month?                                                | 4 | IF YES, ➔ GO TO SECTION 2, P. 12. |
| Less than once a month,<br>but several times in four months? | 3 | IF YES, ➔ GO TO C2.4., P. 11.     |
| Once?                                                        | 2 | IF YES, ➔ GO TO SECTION 2, P. 12. |
| Not at all?                                                  | 1 | IF YES, ➔ GO TO SECTION 2, P. 12. |

|       |                |                      |                                           |
|-------|----------------|----------------------|-------------------------------------------|
| PFDAQ | Participant N° | Interviewer initials | Date of interview presentation (MM DD YY) |
|       | I _ I _ I _ I  | I _ I _ I            | I _ I _ I I _ I _ I I _ I _ I _ I         |

**C2.1.** IF THE NUMBER OF THE ANSWER IS 9 (FREQUENCY HIGHER THAN ONCE A DAY):

Q38. Approximately how many times a day have you had a deviant sexual behavior? I \_ I \_ I \_ I

GO TO SECTION 2, P. 12.

**C2.2.** IF THE NUMBER OF THE ANSWER IS 7 ("MORE THAN ONCE A WEEK"):

Q39. Approximately how many times a week have you had a deviant sexual behavior? I \_ I \_ I \_ I

GO TO SECTION 2, P. 12.

**C2.3.** IF THE NUMBER OF THE ANSWER IS 5 ("SEVERAL TIMES A MONTH"):

Q40. Approximately how many times a month have you had a deviant sexual behavior? I \_ I \_ I \_ I

GO TO SECTION 2, P. 12.

**C2.4.** IF THE NUMBER OF THE ANSWER IS 3 ("SEVERAL TIMES IN 4 MONTHS"):

Q41. Approximately how many times in 4 months have you had a deviant sexual behavior? I \_ I \_ I \_ I

GO TO SECTION 2, P. 12.

|       |                |                      |                                           |
|-------|----------------|----------------------|-------------------------------------------|
| PFDAQ | Participant N° | Interviewer initials | Date of interview presentation (MM DD YY) |
|       | I _ I _ I _ I  | I _ I _ I            | I _ I _ I I _ I _ I I _ I _ I _ I         |

## SECOND SECTION: CHILDREN ONLY

The questions of this section focus exclusively on the fantasies, desires, and sexual activities that you may have had in the last 30 days with children, that is to say with girls or boys, before the onset of puberty or at the beginning of puberty.

As in the first section of this interview, I am going to ask you a number of questions regarding three domains: (1) the domain of sexual fantasies; (2) the domain of sexual desires; and (3) the domain of sexual activities.

1. IF THE PARTICIPANT IS A HEALTHY VOLUNTEER AND IF HE HAS NOT REPORTED ANY SEXUAL FANTASIES, DESIRES, OR ACTIVITIES INVOLVING CHILDREN, TELL HIM:

“Do you confirm that in the last 30 days you have not had any sexual fantasies or sexual desires involving children, and that in the last 4 months you have not had any sexual activities with a child?”

- IF THE PARTICIPANT CONFIRMS THAT HE HAS NOT HAD ANY SEXUAL FANTASIES OR DESIRES OR ACTIVITIES INVOLVING CHILDREN, CHECK “1” (YES) FOR Q42, P. 13, AND FOR Q55, P. 16, AND CIRCLE « 1 » (NOT AT ALL) FOR Q68, P. 20, AND FOR Q72, P. 21. GO TO « PARTICIPANT’ COMMENTS », P. 22.
  - IF THE PARTICIPANT ACKNOWLEDGES THAT HE HAS HAD SEXUAL FANTASIES OR DESIRES OR ACTIVITIES INVOLVING CHILDREN, ASK HIM THE QUESTIONS OF THE CORRESPONDING PARTS OF THE QUESTIONNAIRE HEREAFTER. DEPENDING ON THE PARTICIPANT’S ANSWERS, GO TO Q42 (FANTASIES), P. 13, OR TO Q55 (DESIRES), P. 16, OR TO Q68 (SEXUAL ACTIVITY), P. 20.
2. IF THE SUBJECT WISHES TO PARTICIPATE AS A HEALTHY VOLUNTEER AND HAS REPORTED SEXUAL FANTASIES OR DESIRES OR ACTIVITIES INVOLVING CHILDREN, ASK HIM THE QUESTIONS OF THE CORRESPONDING PARTS OF THE QUESTIONNAIRE HEREAFTER. GO TO Q42 (FANTASIES), P. 13.
  3. IF THE PARTICIPANT IS A PATIENT WITH PEDOPHILIC DISORDER, ASK HIM THE QUESTIONS HEREAFTER, BEGINNING WITH PART D.

|       |                |                      |                                           |
|-------|----------------|----------------------|-------------------------------------------|
| PFDAQ | Participant N° | Interviewer initials | Date of interview presentation (MM DD YY) |
|       | I _ I _ I _ I  | I _ I _ I            | I _ I _ I _ I _ I _ I _ I _ I             |

## PART D SEXUAL FANTASIES ABOUT CHILDREN

FOR THIS PART OF THE QUESTIONNAIRE, THE INTERVIEWER MUST REFER TO QUESTIONS A1, P. 2.

1. **IF THE PARTICIPANT HAS ANSWERED “YES” TO AT LEAST ONE OF THE A1 QUESTIONS ABOUT CHILDREN** (THAT IS TO SAY: “IN THE LAST THIRTY DAYS, HAVE YOU EVER HAD FANTASIES ABOUT FEMALE CHILDREN?” AND/OR “ABOUT MALE CHILDREN?”), **TELL THE PARTICIPANT:**

**You have previously said that it happened to you in the last thirty days to have sexual fantasies about [...] children** (DEPENDING ON PREVIOUS ANSWERS, COMPLETE WITH “FEMALE”, “MALE”, OR “FEMALE AND MALE”).

- a. IF THE PARTICIPANT HAS SPECIFIED IN HIS ANSWERS TO THE A1 QUESTIONS THAT HE HAS ALSO HAD FANTASIES ABOUT ADULTS OR ADOLESCENTS:

**GO TO D2 QUESTION, P. 14.**

- b. IF THE PARTICIPANT’S ANSWERS TO THE A1 QUESTIONS INDICATE THAT HE HAS HAD FANTASIES ONLY ABOUT CHILDREN:

**GO TO PART E, P. 16.**

2. **IF THE PARTICIPANT HAS ANSWERED “NO” TO THE TWO A1 QUESTIONS ABOUT CHILDREN** (THAT IS TO SAY: “IN THE LAST THIRTY DAYS, HAVE YOU EVER HAD FANTASIES ABOUT FEMALE CHILDREN?” AND “ABOUT MALE CHILDREN?”), **TELL THE PARTICIPANT:**

**Q42. Do you confirm that in the last 30 days you have never had any sexual fantasies about children? CHECK THE CORRESPONDING BOX.**

1. YES I \_ I

0. NO I \_ I

- IF THE PARTICIPANT ANSWERS “**YES**” (HE CONFIRMS), GO TO PART E, P. 16.
- IF THE PARTICIPANT ANSWERS “**NO**” (HE DOES NOT CONFIRM), TELL HIM THAT THE QUESTIONS WILL BE ASKED AGAIN AND ASK THE TWO QUESTIONS BELOW:

### D1.

Q43. In the last 30 days, have you had sexual fantasies about **female children**?

1. YES I \_ I

0. NO I \_ I

Q44. In the last 30 days, have you had sexual fantasies about **male children**?

1. YES I \_ I

0. NO I \_ I

- IF THE PARTICIPANT ANSWERS “**YES**” TO AT LEAST ONE OF THE 2 PRECEDING QUESTIONS, GO TO **QUESTION D2, P. 14.**
- IF THE PARTICIPANT ANSWERS “**NO**” TO THE 2 PRECEDING QUESTIONS, GO TO GO TO PART E, P. 16.

|       |                |                      |                                           |
|-------|----------------|----------------------|-------------------------------------------|
| PFDAQ | Participant N° | Interviewer initials | Date of interview presentation (MM DD YY) |
|       | I _ I _ I _ I  | I _ I _ I            | I _ I _ I _ I _ I _ I _ I _ I             |

### FREQUENCY OF SEXUAL FANTASIES ABOUT CHILDREN IN THE LAST 30 DAYS

**D2. In the last thirty days, how many times altogether have you had sexual fantasies about [BASED ON ANSWERS TO Q43 AND TO Q44, FINISH YOUR QUESTION WITH “FEMALE CHILDREN”, OR “MALE CHILDREN”, OR “FEMALE AND MALE CHILDREN”]? Tell me “yes » when what I say corresponds to what happened.**

READ THE PROPOSED ANSWERS UNTIL THE PARTICIPANT SAYS “YES”; CIRCLE THE NUMERAL FACING THE "YES" ANSWER.

**Q45. Did it happen:**

- |                                                                      |   |                                |
|----------------------------------------------------------------------|---|--------------------------------|
| Almost continuously?                                                 | 9 | IF YES, ➔ GO TO D2.1.          |
| More than once an hour?                                              | 8 | IF YES, ➔ GO TO D2.1.          |
| More than once a day?                                                | 7 | IF YES, ➔ GO TO D2.1.          |
| Once a day?                                                          | 6 | IF YES, ➔ GO TO D2.4., P. 15.  |
| Less than once a day,<br>but several times a week?                   | 5 | IF YES, ➔ GO TO D2.2.          |
| Once a week?                                                         | 4 | IF YES, ➔ GO TO D2.4., P. 15.  |
| Less than once a week,<br>but several times in the last thirty days? | 3 | IF YES, ➔ GO TO D2.3.          |
| Once?                                                                | 2 | IF YES, ➔ GO TO D2.4., P. 15.  |
| Not at all?                                                          | 1 | IF YES, ➔ GO TO PART E, P. 16. |

NOTE: FOR ALL QUESTIONS, IF A PARTICIPANT MENTIONS TWO OR MORE NUMBERS IN HIS ANSWER (EX.: "2 OR 3 TIMES"), USE THE MEAN AND WRITE DOWN THE FIRST DECIMAL (EX. "2.5").

**D2.1. IF THE NUMBER OF THE ANSWER IS 7, 8, OR 9 (FREQUENCY HIGHER THAN ONCE A DAY):**

Q46. Approximately how many times a day have you had these sexual fantasies? I \_ I \_ I \_ I  
GO TO D2.4.

**D2.2. IF THE NUMBER OF THE ANSWER IS 5 (FREQUENCY HIGHER THAN ONCE A WEEK):**

Q47. Approximately how many times a week have you had these sexual fantasies? I \_ I \_ I \_ I  
GO TO D2.4.

**D2.3. IF THE NUMBER OF THE ANSWER IS 3 (FREQUENCY HIGHER THAN ONCE IN THE LAST THIRTY DAYS):**

Q48. In the last 30 days, approximately how many times have you had these sexual fantasies? I \_ I \_ I \_ I  
GO TO D2.4.

|       |                |                      |                                           |
|-------|----------------|----------------------|-------------------------------------------|
| PFDAQ | Participant N° | Interviewer initials | Date of interview presentation (MM DD YY) |
|       | I _ I _ I _ I  | I _ I _ I            | I _ I _ I I _ I _ I I _ I _ I             |

**D2.4.** ASK THE FOLLOWING QUESTION TO ALL PARTICIPANTS, EXCEPT THOSE WHO HAVE ANSWERED « NOT AT ALL » TO Q45:

**I am going to ask you how arousing your sexual fantasies about [FINISH YOUR QUESTION BASED ON ANSWERS TO Q43 AND TO Q44] have been, in general, in the last 30 days. Tell me “yes” when what I say corresponds to what you have felt.**

**Q49. Was sexual arousal related to these fantasies ...?**

- |                                      |   |
|--------------------------------------|---|
| 9. Extremely strong?                 | 9 |
| 8. Very strong?                      | 8 |
| 7. Strong?                           | 7 |
| 6. Fairly strong?                    | 6 |
| 5. Moderate?                         | 5 |
| 4. Fairly low?                       | 4 |
| 3. Low?                              | 3 |
| 2. Very low?                         | 2 |
| 1. Nonexistent or quasi nonexistent? | 1 |

**Q50. At what times during the day do you have these sexual fantasies? (NOTE THE ANSWER)**

---



---

**Q51. In general, how long do these fantasies last? (NOTE THE ANSWER)**

---



---

In general, do they last less or more than 15 minutes?

1. More I \_ I

0. Less I \_ I

**Q52. Do they come back into your mind all day long?**

---



---

1. YES I \_ I

0. NO I \_ I

**Q53. Do you seek to drive them out of your mind?**

---



---

1. YES I \_ I

0. NO I \_ I



|       |                |                      |                                           |
|-------|----------------|----------------------|-------------------------------------------|
| PFDAQ | Participant N° | Interviewer initials | Date of interview presentation (MM DD YY) |
|       | I _ I _ I _ I  | I _ I _ I            | I _ I _ I I _ I _ I I _ I _ I _ I         |

IF THE PARTICIPANT ANSWERED YES TO Q53:

Q54. Do you have a hard time to drive these fantasies out of your mind and do they come back despite your efforts?

1. YES I \_ I

0. NO I \_ I

## PART E

### SEXUAL DESIRES FOR CHILDREN

FOR THIS PART OF THE QUESTIONNAIRE, THE INTERVIEWER MUST REFER TO QUESTIONS B1, P. 5.

**1. IF THE PARTICIPANT HAS ANSWERED “YES” TO AT LEAST ONE OF THE B1 QUESTIONS ABOUT CHILDREN (THAT IS TO SAY: “IN THE LAST THIRTY DAYS, HAVE YOU EVER HAD SEXUAL DESIRES FOR FEMALE CHILDREN?” AND/OR “FOR MALE CHILDREN?”):**

a. IF THE PARTICIPANT HAS SPECIFIED IN HIS ANSWERS TO THE B1 QUESTIONS THAT HE HAS ALSO HAD DESIRES FOR ADULTS OR ADOLESCENTS, TELL THE PARTICIPANT:

**You have previously said that it happened to you in the last thirty days to have sexual desires for [...] children (DEPENDING ON PREVIOUS ANSWERS, COMPLETE WITH “FEMALE”, “MALE”, OR “FEMALE AND MALE”).**

**GO TO E2 QUESTION, P. 17.**

b. IF THE PARTICIPANT’S ANSWERS TO THE B1 QUESTIONS INDICATE THAT HE HAS HAD DESIRES ONLY FOR CHILDREN:

**GO TO PART F, P. 19.**

**2. IF THE PARTICIPANT HAS ANSWERED “NO” TO THE TWO B1 QUESTIONS ABOUT CHILDREN (THAT IS TO SAY: “IN THE LAST THIRTY DAYS, HAVE YOU EVER HAD DESIRES FOR FEMALE CHILDREN?” AND “FOR MALE CHILDREN?”), TELL THE PARTICIPANT:**

**Q55. Do you confirm that in the last 30 days you have never had any sexual desires for children? CHECK THE CORRESPONDING BOX.**

1. YES I \_ I

0. NO I \_ I

- IF THE PARTICIPANT ANSWERS “YES” (HE CONFIRMS), GO TO PART F, P. 19.

| PFDAQ | Participant N° | Interviewer initials | Date of interview presentation (MM DD YY) |
|-------|----------------|----------------------|-------------------------------------------|
|       | I _ I _ I _ I  | I _ I _ I            | I _ I _ I I _ I _ I I _ I _ I             |

- IF THE PARTICIPANT ANSWERS “**NO**” (HE DOES NOT CONFIRM), TELL HIM THAT THE QUESTIONS WILL BE ASKED AGAIN AND ASK THE TWO QUESTIONS BELOW:

**E1.**

Q56. In the last 30 days, have you had sexual desires for **female children**?

1. YES I \_ I                      0. NO I \_ I

Q57. In the last 30 days, have sexual desires for **male children**?

1. YES I \_ I                      0. NO I \_ I

- IF THE PARTICIPANT ANSWERS “**YES**” TO AT LEAST ONE OF THE 2 PRECEDING QUESTIONS, GO TO **QUESTION E2**.
- IF THE PARTICIPANT ANSWERS “**NO**” TO THE 2 PRECEDING QUESTIONS, GO TO GO TO PART F, P. 19.

**FREQUENCY OF SEXUAL DESIRES FOR CHILDREN IN THE LAST 30 DAYS**

**E2. In the last thirty days, how many times altogether have you had sexual desires for [BASED ON ANSWERS TO Q17 AND Q18, OR TO Q56 AND Q57, FINISH YOUR QUESTION WITH “FEMALE CHILDREN”, OR “MALE CHILDREN”, OR “FEMALE AND MALE CHILDREN”]? If you have watched erotic photographs or movies showing children (on the Internet or otherwise), take into account the sexual desires you felt on these occasions. Tell me “yes” when what I say corresponds to what happened.**

READ THE PROPOSED ANSWERS UNTIL THE PARTICIPANT SAYS “YES”; CIRCLE THE NUMERAL FACING THE "YES" ANSWER.

**Q58. Did it happen:**

|                                                                      |   |                                |
|----------------------------------------------------------------------|---|--------------------------------|
| Almost continuously?                                                 | 9 | IF YES, ➔ GO TO E2.1., P. 18.  |
| More than once an hour?                                              | 8 | IF YES, ➔ GO TO E2.1., P. 18.  |
| More than once a day?                                                | 7 | IF YES, ➔ GO TO E2.1., P. 18.  |
| Once a day?                                                          | 6 | IF YES, ➔ GO TO E2.4., P. 18.  |
| Less than once a day,<br>but several times a week?                   | 5 | IF YES, ➔ GO TO E2.2., P. 18.  |
| Once a week?                                                         | 4 | IF YES, ➔ GO TO E2.4., P. 18.  |
| Less than once a week,<br>but several times in the last thirty days? | 3 | IF YES, ➔ GO TO E2.3., P. 18.  |
| Once?                                                                | 2 | IF YES, ➔ GO TO E2.4., P. 18.  |
| Not at all?                                                          | 1 | IF YES, ➔ GO TO PART F, P. 19. |

|       |                |                      |                                           |
|-------|----------------|----------------------|-------------------------------------------|
| PFDAQ | Participant N° | Interviewer initials | Date of interview presentation (MM DD YY) |
|       | I _ I _ I _ I  | I _ I _ I            | I _ I _ I I _ I _ I _ I _ I _ I           |

NOTE: FOR ALL QUESTIONS HEREUNDER, IF A PARTICIPANT MENTIONS TWO OR MORE NUMBERS IN HIS ANSWER (EX.: "2 OR 3 TIMES"), USE THE MEAN AND WRITE DOWN THE FIRST DECIMAL (EX. "2.5").

**E2.1.** IF THE NUMBER OF THE ANSWER TO Q58 IS 7, 8, OR 9 (FREQUENCY HIGHER THAN ONCE A DAY):

Q59. Approximately how many times a day have you had these sexual desires? I \_ I \_ I . I \_ I

GO TO E2.4.

**E2.2.** IF THE NUMBER OF THE ANSWER TO Q58 IS 5 (FREQUENCY HIGHER THAN ONCE A WEEK):

Q60. Approximately how many times a week have you had these sexual desires? I \_ I \_ I . I \_ I

GO TO E2.4.

**E2.3.** IF THE NUMBER OF THE ANSWER TO Q58 IS 3 (FREQUENCY HIGHER THAN ONCE IN THE LAST 30 DAYS):

Q61. In the last 30 days, approximately how many times have you had these sexual desires? I \_ I \_ I . I \_ I

GO TO E2.4.

**E2.4.** ASK THE FOLLOWING QUESTION TO ALL PARTICIPANTS, EXCEPT THOSE WHO HAVE ANSWERED « NOT AT ALL » TO Q58:

**I am going to ask you how arousing your sexual desires for [BASED ON ANSWERS TO Q17 AND Q18, OR TO Q56 AND TO Q57, FINISH YOUR QUESTION WITH “FEMALE CHILDREN”, OR “MALE CHILDREN”, OR “FEMALE AND MALE CHILDREN”] have been, in general, in the last 30 days. Tell me “yes” when what I say corresponds to what you have felt.**

**Q62. Was sexual arousal related to these desires ...?**

- |                                      |   |
|--------------------------------------|---|
| 9. Extremely strong?                 | 9 |
| 8. Very strong?                      | 8 |
| 7. Strong?                           | 7 |
| 6. Fairly strong?                    | 6 |
| 5. Moderate?                         | 5 |
| 4. Fairly low?                       | 4 |
| 3. Low?                              | 3 |
| 2. Very low?                         | 2 |
| 1. Nonexistent or quasi nonexistent? | 1 |

|       |                |                      |                                           |
|-------|----------------|----------------------|-------------------------------------------|
| PFDAQ | Participant N° | Interviewer initials | Date of interview presentation (MM DD YY) |
|       | I _ I _ I _ I  | I _ I _ I            | I _ I _ I I _ I _ I _ I _ I _ I           |

Q63. At what times during the day do you have these sexual desires? (NOTE THE ANSWER)

---



---

Q64. In general, how long do these desires last? (NOTE THE ANSWER)

---



---

In general, do they last less or more than 15 minutes?

1. More I \_ I

0. Less I \_ I

Q65. Do they come back into your mind all day long?

---



---

1. YES I \_ I

0. NO I \_ I

Q66. Do you seek to drive them out of your mind?

---



---

1. YES I \_ I

0. NO I \_ I

IF THE PARTICIPANT ANSWERED “YES” TO Q66:

Q67. Do you have a hard time to drive these desires out of your mind and do they come back despite your efforts?

---



---



---

1. YES I \_ I

0. NO I \_ I

## **PART F: SEXUAL ACTIVITY WITH CHILDREN**

### **FREQUENCY OF SEXUAL ACTIVITY WITH CHILDREN** **IN THE LAST 30 DAYS**

**F1. In the last thirty days, how many times altogether have you had an ejaculation whether through masturbating while imagining being with a child, or through a sexual activity with a real child? Tell me “yes » when what I say corresponds to what happened.**

[IF THE PARTICIPANT SEEMS NOT TO UNDERSTAND, ADD THIS SENTENCE: “THIS QUESTION DOES NOT FOCUS ON EJACULATIONS PROVOKED THROUGH MASTURBATING WHILE THINKING ABOUT AN ADULT OR AN ADOLESCENT, OR ON EJACULATIONS PROVOKED THROUGH A SEXUAL ACTIVITY WITH A REAL ADULT OR ADOLESCENT.”]

READ THE PROPOSED ANSWERS UNTIL THE PARTICIPANT SAYS “YES”; CIRCLE THE NUMERAL FACING THE “YES” ANSWER.

| PFDAQ | Participant N° | Interviewer initials | Date of interview presentation (MM DD YY) |
|-------|----------------|----------------------|-------------------------------------------|
|       | I _ I _ I _ I  | I _ I _ I            | I _ I _ I I _ I _ I I _ I _ I _ I         |

**Q68. Did it happen:**

|                                                                      |   |                            |
|----------------------------------------------------------------------|---|----------------------------|
| More than three times a day?                                         | 9 | IF YES, ➔ GO TO F1.1.      |
| More than twice a day?                                               | 8 | IF YES, ➔ GO TO F1.1.      |
| More than once a day?                                                | 7 | IF YES, ➔ GO TO F1.1.      |
| Once a day?                                                          | 6 | IF YES, ➔ GO TO F2, P. 21. |
| Less than once a day,<br>but several times a week?                   | 5 | IF YES, ➔ GO TO F1.2.      |
| Once a week?                                                         | 4 | IF YES, ➔ GO TO F2, P. 21. |
| Less than once a week,<br>but several times in the last thirty days? | 3 | IF YES, ➔ GO TO F1.3.      |
| Once in the last thirty days?                                        | 2 | IF YES, ➔ GO TO F2, P. 21. |
| Not at all?                                                          | 1 | IF YES, ➔ GO TO F2, P. 21. |

**F1.1.** IF THE NUMBER OF THE ANSWER IS 7, 8, OR 9 (FREQUENCY HIGHER THAN ONCE A DAY):

Q69. Approximately how many times a day have you had an ejaculation whether through masturbating while imagining being with a child, or through a sexual activity with a real child? I \_ I \_ I \_ I

GO TO F2, P. 21.

**F1.2.** IF THE NUMBER OF THE ANSWER IS 5 ("SEVERAL TIMES A WEEK"):

Q70. Approximately how many times a week have you had an ejaculation whether through masturbating while imagining being with a child, or through a sexual activity with a real child? I \_ I \_ I \_ I

GO TO F2, P. 21.

**F1.3.** IF THE NUMBER OF THE ANSWER IS 3 ("SEVERAL TIMES IN THE LAST THIRTY DAYS"):

Q71. In the last 30 days, approximately how many times have you had an ejaculation whether through masturbating while imagining being with a child, or through a sexual activity with a real child? I \_ I \_ I \_ I

GO TO F2, P. 21.

### FREQUENCY OF SEXUAL BEHAVIORS WITH CHILDREN IN THE LAST 4 MONTHS

NOTE. FOR MEN WHO HAVE BEEN FREED FROM PRISON LESS THAN 4 MONTHS BEFORE THE INTERVIEW, THE PERIODS THAT MUST BE TAKEN INTO ACCOUNT IN ORDER TO ASSESS THE FREQUENCY OF SEXUAL BEHAVIORS WITH CHILDREN IN THE LAST 4 MONTHS ARE THE PERIOD THAT FOLLOWS RELEASE FROM PRISON AND THE PERIOD PRECEDING THE ARREST LEADING TO IMPRISONMENT. EXAMPLE 1: FOR A PARTICIPANT RELEASED ONE MONTH BEFORE THE INTERVIEW, THE INTERVIEWER MUST TAKE INTO ACCOUNT THE MONTH FOLLOWING THE RELEASE AND THE 3 MONTHS PRECEDING THE ARREST LEADING TO IMPRISONMENT. EXAMPLE 2: FOR A PARTICIPANT RELEASED 2 DAYS BEFORE THE INTERVIEW, THE INTERVIEWER MUST TAKE INTO ACCOUNT THE 4 MONTHS PRECEDING THE ARREST LEADING TO IMPRISONMENT.

|       |                |                      |                                           |
|-------|----------------|----------------------|-------------------------------------------|
| PFDAQ | Participant N° | Interviewer initials | Date of interview presentation (MM DD YY) |
|       | I _ I _ I _ I  | I _ I _ I            | I _ I _ I I _ I _ I I _ I _ I _ I         |

**F2. My next question focuses on sexual activities where a real child was present, whether ejaculation happened or not. By contrast, if you limited your behavior to imagining a child while you were masturbating, or to watching erotic photographs or movies showing children (on the Internet or otherwise), do not take this into account in your answer to this question. Take again the sheet of paper I gave you a short while ago. By “sexual activity with a child”, I mean any sexual behavior with a child, even if it seemed to you that the child was consenting and even if you did not have an ejaculation.**

IF THE PARTICIPANT HAS BEEN RELEASED FROM PRISON LESS THAN 4 MONTHS AGO, TELL HIM:

**The four-month period that I ask you to take into account comprises the [n1] weeks before you were arrested and imprisoned, plus the [n2] weeks since you were released from prison.**

**In the last 4 months, how many times altogether have you had a sexual activity with a child, whether or not ejaculation occurred?**

READ THE PROPOSED ANSWERS UNTIL THE PARTICIPANT SAYS “YES”; CIRCLE THE NUMERAL FACING THE "YES" ANSWER.

Q72. Did it happen:

|                                                              |   |                                                   |
|--------------------------------------------------------------|---|---------------------------------------------------|
| More than once a day?                                        | 9 | IF YES, ➔ GO TO F2.1.                             |
| Once a day?                                                  | 8 | IF YES, ➔ GO TO Q77, P. 22.                       |
| Less than once a day,<br>but several times a week?           | 7 | IF YES, ➔ GO TO F2.2.                             |
| Once a week?                                                 | 6 | IF YES, ➔ GO TO Q77, P. 22.                       |
| Less than once a week,<br>but several times a month?         | 5 | IF YES, ➔ GO TO F2.3, P. 22.                      |
| Once a month?                                                | 4 | IF YES, ➔ GO TO Q77, P. 22.                       |
| Less than once a month,<br>but several times in four months? | 3 | IF YES, ➔ GO TO F2.4, P. 22.                      |
| Once in four months?                                         | 2 | IF YES, ➔ GO TO Q77, P. 22.                       |
| Not at all?                                                  | 1 | IF YES, ➔ GO TO PARTICIPANT’S COMMENTS,<br>P. 22. |

**F2.1. IF THE NUMBER OF THE ANSWER IS 9 (FREQUENCY HIGHER THAN ONCE A DAY):**

Q73. Approximately how many times a day have you had a sexual activity with a child? I \_ I \_ I . I \_ I  
GO TO Q77, P. 22.

**F2.2. IF THE NUMBER OF THE ANSWER IS 7 ("MORE THAN ONCE A WEEK"):**

Q74. Approximately how many times a week have you had a sexual activity with a child? I \_ I \_ I . I \_ I  
GO TO Q77, P. 22.

| PFDAQ | Participant N° | Interviewer initials | Date of interview presentation (MM DD YY) |
|-------|----------------|----------------------|-------------------------------------------|
|       | I _ I _ I _ I  | I _ I _ I            | I _ I _ I I _ I _ I I _ I _ I _ I         |

**F2.3.** IF THE NUMBER OF THE ANSWER IS 5 (“SEVERAL TIMES A MONTH”):

Q75. Approximately how many times a month have you had a sexual activity with a child? I \_ I \_ I.I \_ I

GO TO Q77.

**F2.4.** IF THE NUMBER OF THE ANSWER IS 3 (“SEVERAL TIMES IN 4 MONTHS”):

Q76. Approximately how many times in 4 months have you had a sexual activity with a child? I \_ I \_ I.I \_ I

ASK THE FOLLOWING QUESTION TO PARTICIPANTS WHO ACKNOWLEDGE THEY HAVE HAD A SEXUAL ACTIVITY WITH A CHILD AT LEAST ONCE IN THE LAST 4 MONTHS:

Q77. Did at least one of these sexual activities occur while you were engaged in psychotherapy with a psychiatrist, a psychologist, or a social worker?

1. YES I \_ I                      0. NO I \_ I

### **PARTICIPANT’S COMMENTS**

Do you have any comments about the interview I have just presented to you? (NOTE COMMENTS)

---



---



---



---



---

| PFDAQ | Participant N° | Interviewer initials | Date of interview presentation (MM DD YY) |
|-------|----------------|----------------------|-------------------------------------------|
|       | I _ I _ I _ I  | I _ I _ I            | I _ I _ I I _ I _ I _ I _ I _ I           |

### Deviant sexual behaviors

**For every behavior listed hereunder, check the YES box or the NO box depending on whether or not you have had the corresponding behavior in the last 4 months.**

**A) Sexual behaviors with children, adolescents or adults of the following kinds:**

|                                                                                                                                                 | Yes                      | No                       |
|-------------------------------------------------------------------------------------------------------------------------------------------------|--------------------------|--------------------------|
| • exhibitionism (showing one's genitals to a nonconsenting person) _____                                                                        | <input type="checkbox"/> | <input type="checkbox"/> |
| • voyeurism (to look at a nude person without her or his consent) _____                                                                         | <input type="checkbox"/> | <input type="checkbox"/> |
| • fetishism (to use objects such as shoes, underwear, gloves, etc., to get sexually aroused) _____                                              | <input type="checkbox"/> | <input type="checkbox"/> |
| • transvestism (to dress as a woman) _____                                                                                                      | <input type="checkbox"/> | <input type="checkbox"/> |
| • frotteurism (to touch or to rub against a nonconsenting person) _____                                                                         | <input type="checkbox"/> | <input type="checkbox"/> |
| • masochism (behaviors where a person feels sexual pleasure when he or she suffers, for instance when beaten or humiliated) _____               | <input type="checkbox"/> | <input type="checkbox"/> |
| • sadism (behaviors where a person feels sexual pleasure when he or she causes another person to suffer) _____                                  | <input type="checkbox"/> | <input type="checkbox"/> |
| • rape (any type of sexual penetration forced upon another person, whether it is achieved with the penis, the fingers or a foreign body)? _____ | <input type="checkbox"/> | <input type="checkbox"/> |
| • any other sexual behavior that seemed deviant <u>to you</u> _____                                                                             | <input type="checkbox"/> | <input type="checkbox"/> |

**B) Sexual behaviors with children or performed in the presence of children: any sexual behaviors with children or performed in the presence of children are to be taken into account, even if it seemed to you that the child was consenting.**

|                                                                                                    | Yes                      | No                       |
|----------------------------------------------------------------------------------------------------|--------------------------|--------------------------|
| • Exhibiting your genitals _____                                                                   | <input type="checkbox"/> | <input type="checkbox"/> |
| • Undressing the child and watching her/him naked _____                                            | <input type="checkbox"/> | <input type="checkbox"/> |
| • Kissing (or touching with your mouth) a child's breasts _____                                    | <input type="checkbox"/> | <input type="checkbox"/> |
| • Kissing a child's lips in a sexual manner _____                                                  | <input type="checkbox"/> | <input type="checkbox"/> |
| • Masturbating in a child's presence _____                                                         | <input type="checkbox"/> | <input type="checkbox"/> |
| • Touching or caressing a child's genitals or buttocks _____                                       | <input type="checkbox"/> | <input type="checkbox"/> |
| • Getting a child to touch your genitals _____                                                     | <input type="checkbox"/> | <input type="checkbox"/> |
| • Getting a child to kiss or to touch with her/his mouth your anus or your buttocks _____          | <input type="checkbox"/> | <input type="checkbox"/> |
| • Performing cunnilingus on a child (cunnilingus: putting one's mouth on a girl's genitals) _____  | <input type="checkbox"/> | <input type="checkbox"/> |
| • Kissing or touching with your mouth a child's anus or buttocks _____                             | <input type="checkbox"/> | <input type="checkbox"/> |
| • Performing fellatio on a child (fellatio: sucking or putting one's mouth on a boy's penis) _____ | <input type="checkbox"/> | <input type="checkbox"/> |
| • Getting a child to perform fellatio on you _____                                                 | <input type="checkbox"/> | <input type="checkbox"/> |
| • Rubbing your penis on a child _____                                                              | <input type="checkbox"/> | <input type="checkbox"/> |
| • Penetrating a child's vagina, mouth, or anus with your fingers or anything else _____            | <input type="checkbox"/> | <input type="checkbox"/> |
| • Penetrating a child's vagina or anus with your penis _____                                       | <input type="checkbox"/> | <input type="checkbox"/> |
| • Getting a child to put her/his finger into your anus _____                                       | <input type="checkbox"/> | <input type="checkbox"/> |
| • Getting a child to put his penis into your anus _____                                            | <input type="checkbox"/> | <input type="checkbox"/> |
| • Any other sexual behavior with a child; specify: _____                                           | <input type="checkbox"/> | <input type="checkbox"/> |

If you have answered YES at least once to questions of the (B) section, please answer the 3 following questions:

|                                                                                                                                    |                          |                          |
|------------------------------------------------------------------------------------------------------------------------------------|--------------------------|--------------------------|
| 1. Did the victim suffer bodily harm? _____                                                                                        | <input type="checkbox"/> | <input type="checkbox"/> |
| 2. Did you make the victim unable to defend herself/himself, through drugs, tying her/him up, using physical violence, etc.? _____ | <input type="checkbox"/> | <input type="checkbox"/> |
| 3. Did you use a weapon? _____                                                                                                     | <input type="checkbox"/> | <input type="checkbox"/> |
